# Supplementary material
Source: Springer Nature journal article supplement (https://www.springermedizin.de/resource/supplementary/12245_2010_55_MOESM1_ESM.pdf/9672676)

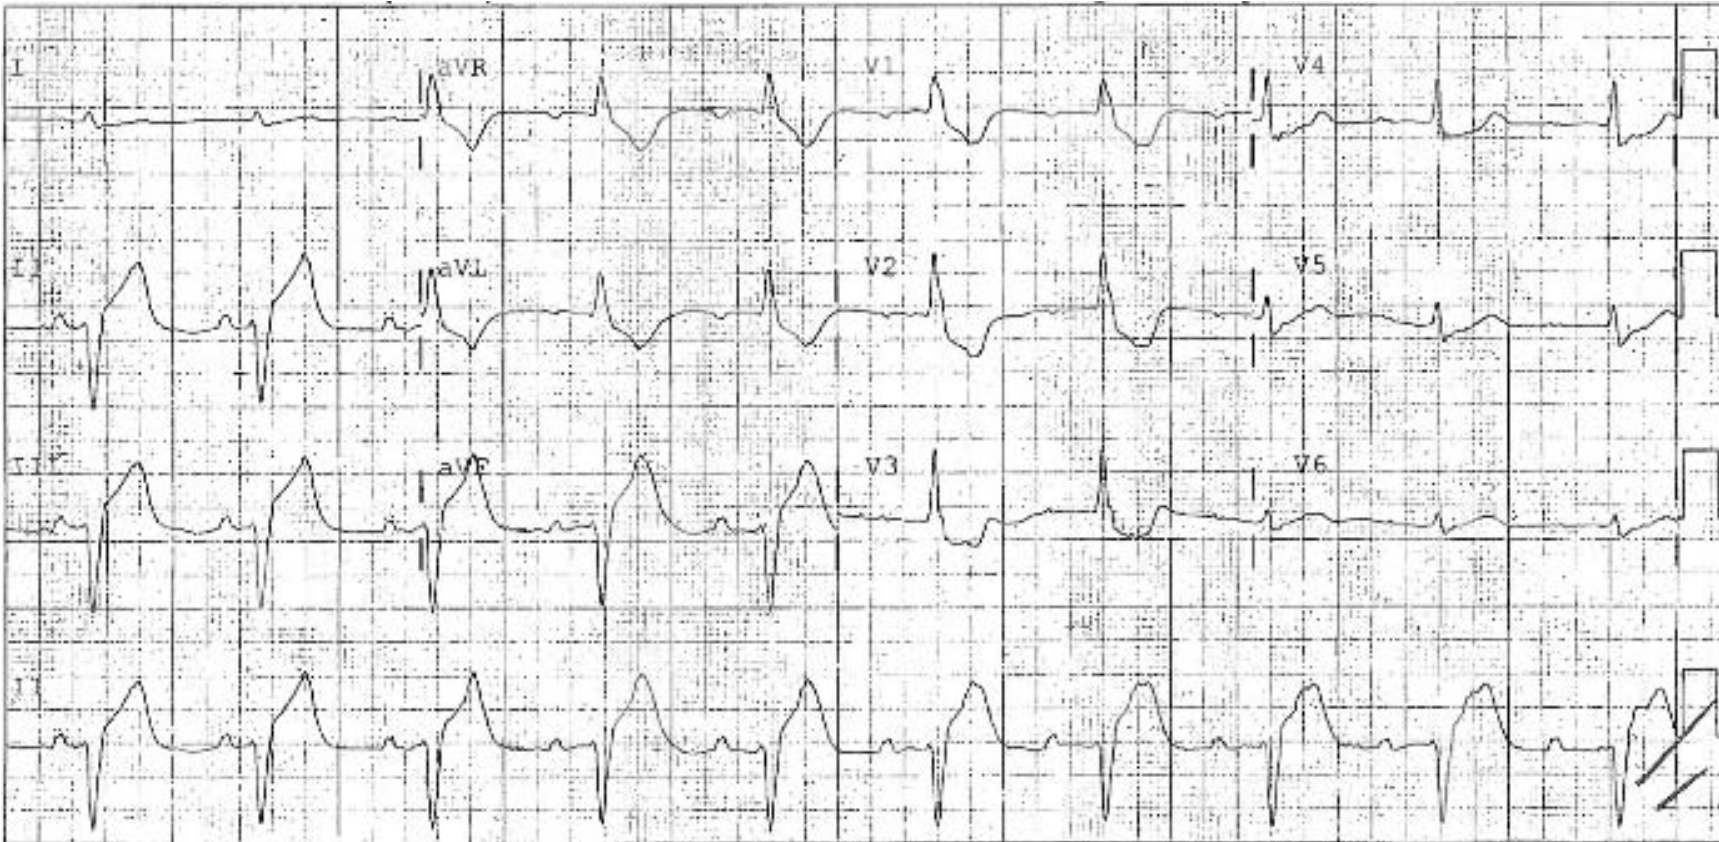

Supplement: MOESM1 [file 9672676]
